# Supplementary material for: Glutathione S-transferase templated copper nanoclusters as a fluorescent probe for turn-on sensing of chlorotetracycline
Source: Royal Society of Chemistry journal article supplement (doi:10.1039/d3na00577a), 2023-12-14
Supplement: d3na00577a1.pdf [file d3na00577a1.pdf]

## Electronic Supporting Information

### Glutathione S-transferase templated copper nanoclusters as fluorescent probe for turn-on sensing of chlorotetracycline

Jiaxi Wang,<sup>a</sup> Wenting Chen,<sup>a, b</sup> Lei Cao,<sup>a</sup> Mengyan Zhou,<sup>a</sup> Yongkang Geng,<sup>a</sup> Yifei Liu,<sup>c</sup> Shushu Ding<sup>a\*</sup>, Ding-Yi Fu<sup>a\*</sup>

a. School of Pharmacy and Jiangsu Province Key Laboratory for Inflammation and Molecular Drug Target, Nantong University, No. 19 Qixiu Road, Nantong, 226001, China.

b. Rudong County People's Hospital, No.2 Jianghai West Road, Chengzhong Street, Rudong County, Nantong, 226400, China.

c. Department of Pathology, Affiliated Hospital of Nantong University, Nantong, 226001, China.

E-mail: [fudingyi@ntu.edu.cn](mailto:fudingyi@ntu.edu.cn); [ssding@ntu.edu.cn](mailto:ssding@ntu.edu.cn)

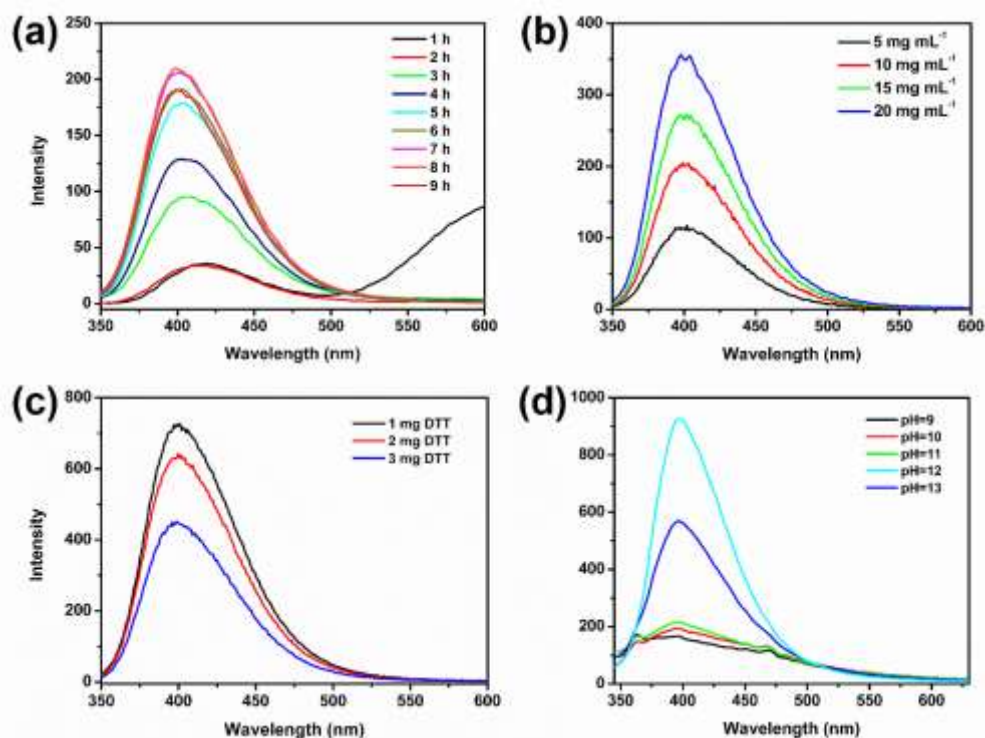

**Fig. S1** Fluorescence intensity of GST-CuNCs being synthesized (a) for different reaction times, (b) at different concentration of GST (5.0-20.0 mg mL<sup>-1</sup>), (c) with different amount of DTT and (d) at different pH value. All fluorescence spectra were measured under excitation of 325 nm.

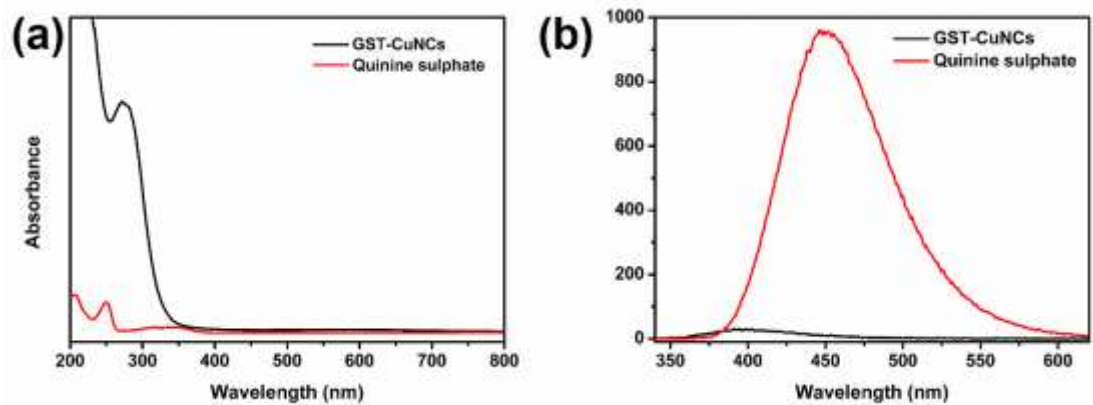

**Fig. S2** (a) UV-vis absorption spectrum and (b) fluorescence emission spectra of the prepared GST-CuNCs (black) and the standard fluorophore, quinine sulphate (red), respectively.

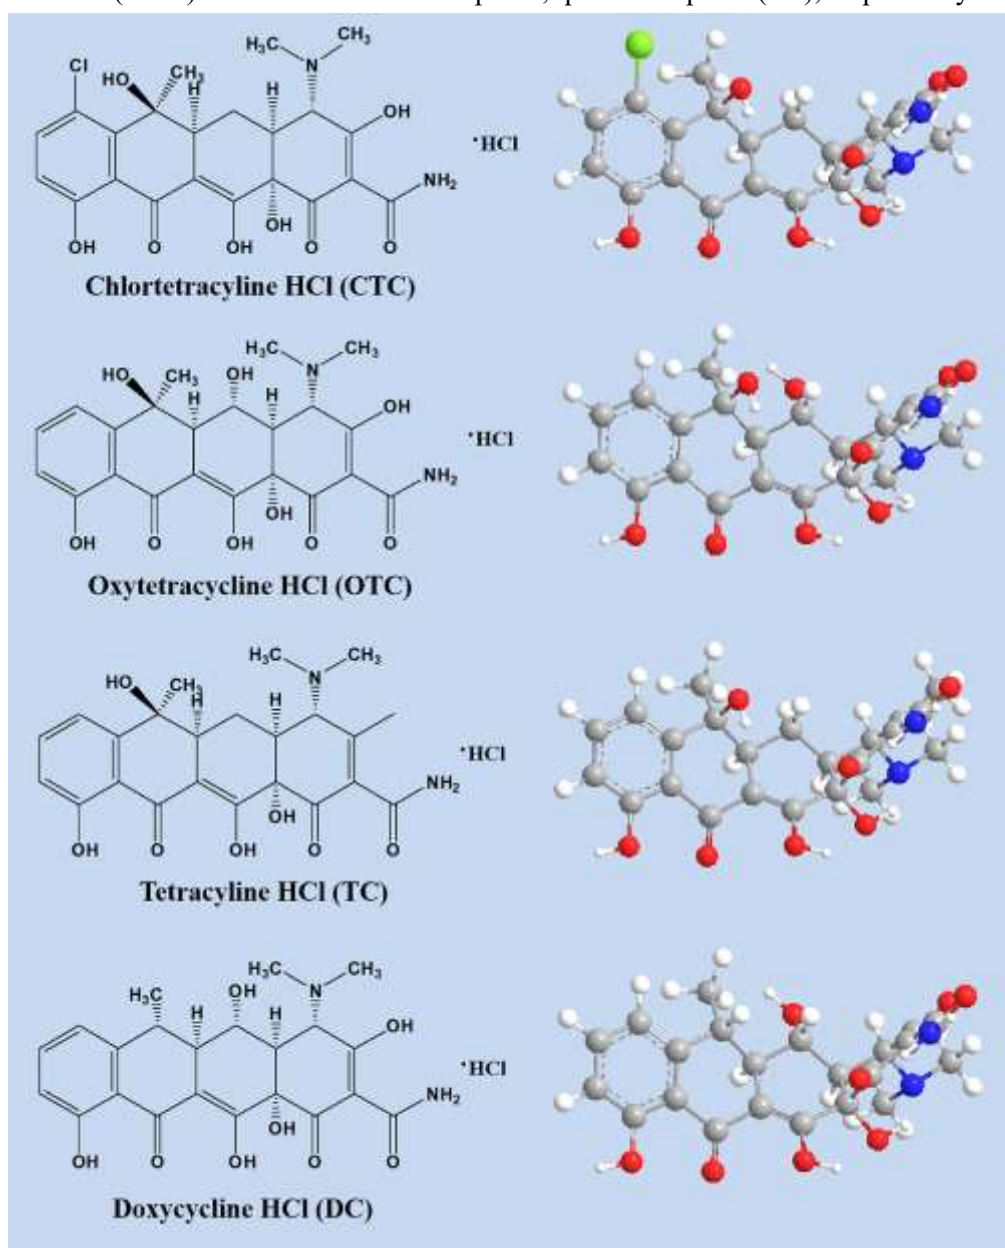

**Fig. S3** The molecular structural of chlortetracycline (CTC), and its analogues.

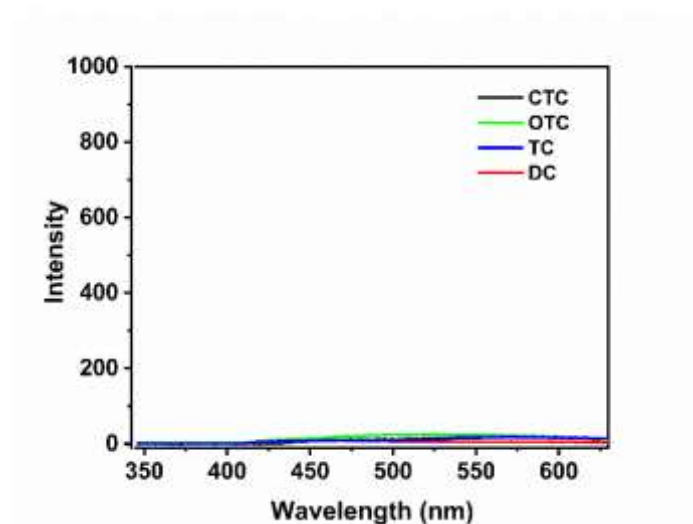

**Fig. S4** Fluorescence spectra of tetracycline antibiotics in PBS under excitation at 325 nm.

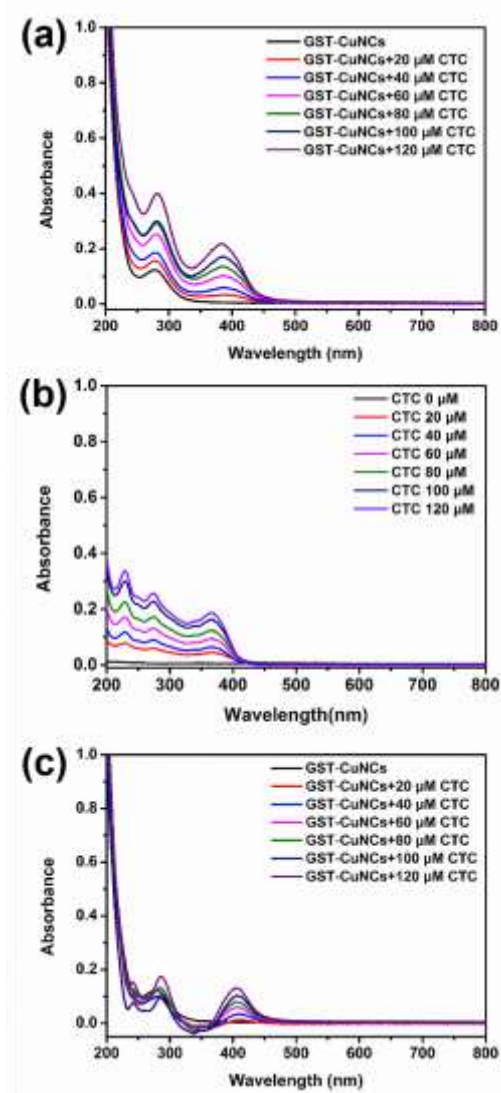

**Fig. S5** The UV-Vis absorption spectrum of (a) the GST-CuNC with different amount of CTC, (b) The UV-Vis absorption spectrum of different amount of CTC and (c) subtract the absorption of CTC at the corresponding concentration.

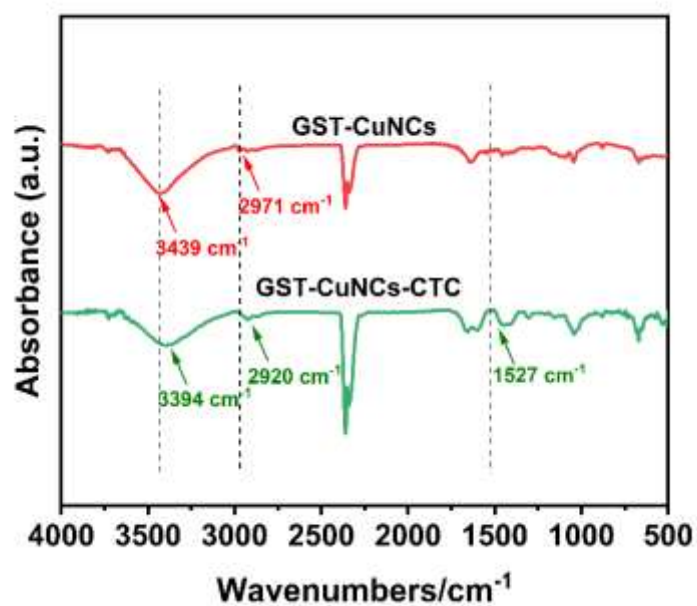

Fig. S6 The comparison of FT-IR spectra between GST-CuNCs and GST-CuNCs-CTC.

**Table S1** A summary of nanoclusters synthesized with different ligands.

| Stabilizing agent | Synthesis Methods | Temperature (°C) | Reaction time | QY (%)      | $\lambda_{ex}/\lambda_{em}$ (nm) | Ref.              |
|-------------------|-------------------|------------------|---------------|-------------|----------------------------------|-------------------|
| BSA               | Microwave         | ---              | 40 S          | 6.4         | 320/405                          | 1                 |
| BSA               | Stirring          | 55               | 6-8 h         | 0.15        | 325/410                          | 2                 |
| lysozyme          | Stirring          | 40               | 2 h           | 5.6         | 365/600                          | 3                 |
| Ovalbumin         | Heating           | 85               | 4 h           | NP          | 370/440                          | 4                 |
| Transferrin       | Stirring          | 37               | 10 h          | 7.5         | 375/460                          | 5                 |
| HSA               | Stirring          | 40               | 12 h          | 4           | 330/414                          | 6                 |
| Chicken egg white | Stirring          | 55               | 8 h           | 0.98        | 337/417                          | 7                 |
| <b>GST</b>        | <b>Stirring</b>   | <b>25</b>        | <b>8 h</b>    | <b>1.36</b> | <b>325/400</b>                   | <b>This paper</b> |

**Table S2** The lifetime of GST-CuNC and addition of CTC (60  $\mu$ M and 120  $\mu$ M)

| Components                        | Lifetimes&percentage |       |             |       |
|-----------------------------------|----------------------|-------|-------------|-------|
|                                   | $\tau_1/ns$          | $a_1$ | $\tau_2/ns$ | $a_2$ |
| 1.0 mg mL <sup>-1</sup> GST-CuNCs | 1.43                 | 54.28 | 7.06        | 45.72 |
| +60 $\mu$ M OTC                   | 3.77                 | 49.25 | 9.84        | 50.75 |
| +120 $\mu$ M OTC                  | 4.38                 | 69.12 | 13.41       | 30.88 |

## References:

- 1 N. Goswami, A. Giri, M. S. Bootharaju, P. L. Xavier, T. Pradeep and S. K. Pal, *Anal. Chem.*, 2011, **83**, 9676–9680.
- 2 M. Jayasree, R. S. Aparna, R. R. Anjana, J. S. Anjali Devi, N. John, K. Abha, A. Manikandan and S. George, *Anal. Chim. Acta*, 2018, **1031**, 152–160.
- 3 C. Wang, S. Shu, Y. Yao and Q. Song, *RSC Adv.*, 2015, **5**, 101599–101606.
- 4 M. Zhang, J. Qiao, S. Zhang and L. Qi, *Talanta*, 2018, **182**, 595–599.
- 5 U. Goswami, A. Dutta, A. Raza, R. Kandimalla, S. Kalita, S. S. Ghosh and A. Chattopadhyay, *ACS Appl. Mater. Interfaces*, 2018, **10**, 3282–3294.
- 6 S. Ghosh, N. K. Das, U. Anand and S. Mukherjee, *J. Phys. Chem. Lett.*, 2015, **6**, 1293–1298.
- 7 Y. Qiao, T. Xu, Y. Zhang, C. Zhang, L. Shi, G. Zhang, S. Shuang and C. Dong, *Sensor. Actuat. B*, 2015, **220**, 1064–1069.
